# Supplementary material for: Retrograde Procedural Memory in Parkinson’s Disease: A Cross-Sectional, Case-Control Study
Source: PubMed Central journal article supplement (PMC9108589; doi:10.3233/jpd-213081), 2022-04-05
Supplement: jpd-12-jpd213081-s001.pdf [file jpd-12-jpd213081-s001.pdf]

# Supplementary Material

## Retrograde Procedural Memory in Parkinson's Disease: A Cross-Sectional, Case-Control Study

**Supplementary Table 1.** Correlations for the Intermediate Scores 1 and possible interfering factors

|                              |                                               | N  | Spearman –<br>Correlation<br>coefficient R | p     |
|------------------------------|-----------------------------------------------|----|--------------------------------------------|-------|
| Visuo-constructive abilities | <b>Qualitative Scoring MMSE Pentagon Test</b> | 54 | - 0.103                                    | 0.462 |
| Visuo-spatial abilities      | <b>Benton Judgment of Line Orientation</b>    | 56 | + 0.058                                    | 0.249 |
| Executive functions          | <b>Frontal Assessment Battery</b>             | 73 | + 0.102                                    | 0.392 |
| Visuo-constructive abilities | <b>Rey-Osterrieth Complex Figure - Copy</b>   | 34 | + 0.169                                    | 0.338 |
| Planning functions           | <b>Rey-Osterrieth Complex Figure - Type</b>   | 34 | - 0.381                                    | 0.831 |

**Supplementary Figure 1.** Example of a cube drawing without a typical procedure. This participant would get a correct final result by copying the cube line by line, without using a pre-defined procedure.

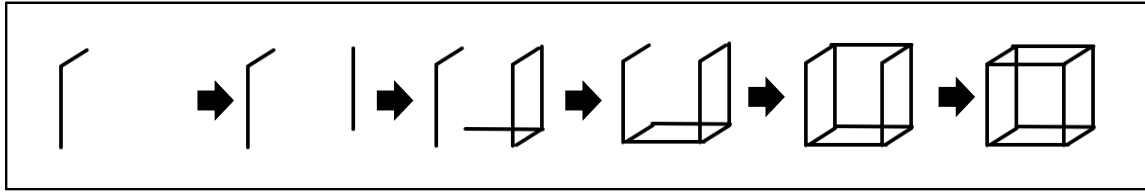

**Supplementary Figure 2.** Examples of cube drawings and their evaluation scores. (A)  $IS_1 < 3$  and  $IS_2 = 3$  or  $IS_1 = 3$  and  $IS_2 = 3$ ; (B)  $IS_1 < 3$  and  $IS_2 < 3$ ; (C)  $IS_1 = 0$  and  $IS_2 = 0$ ; (D)  $IS_1 = 3$  and  $IS_2 < 3$ .

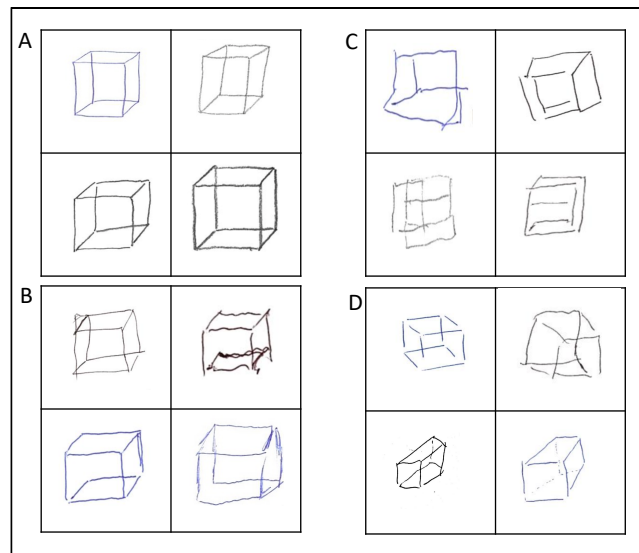

Further qualitative analyses revealed four possible scenarios for the final results of the cube copying:

- (A) A correct final result of the cube drawing ( $IS_2 = 3$ ), that was obtained by the application of a copying procedure ( $IS_1 = 3$ ). Even when not using a typical copying procedure ( $IS_1 < 3$ ) it was possible to get a correct final result ( $IS_2 = 3$ ), by simply copying the cube line by line, continuously comparing their drawing with the figure without using a typical procedure (Supplementary Figure 1).
- (B) A slightly incorrect final result of the cube drawing ( $IS_2 < 3$ ), often characterized by the addition and/or omission of an element during the copying of the cube, in those who copied the cube line by line without a clear procedure ( $IS_1 < 3$ ).
- (C) An incorrect final result with almost no resemblance to the cube ( $IS_2 = 0$ ) did not fulfill the above-described criteria and was therefore not correct ( $IS_1 = 0$ ).
- (D) A procedure was applied ( $IS_1 = 3$ ) but the final result is wrong ( $IS_2 < 3$ ). This observation is reflected by cubes that are wrongly oriented, wrong proportioned, or in mirror-representation.
